# Supplementary material
Source: MDPI journal article supplement (https://www.mdpi.com/2313-433X/7/8/127)
Supplement: s1 [file s1]

## Article

# Yellow Pigment Powders Based on Lead and Antimony: Particle Size and Colour Hue

Giuseppe Capobianco <sup>1</sup>, Giorgia Agresti <sup>2</sup>, Giuseppe Bonifazi <sup>1</sup>, Silvia Serranti <sup>1</sup> and Claudia Pelosi <sup>2,\*</sup>
<sup>1</sup> Department of Chemical Engineering Materials & Environment, Sapienza, Rome University, Via Eudossiana 18, 00184 Rome, Italy; giuseppe.capobianco@uniroma1.it (G.C.); giuseppe.bonifazi@uniroma1.it (G.B.); silvia.serranti@uniroma1.it (S.S.)

<sup>2</sup> Department of Economics, Engineering, Society and Business Organization, Laboratory of Diagnostics and Materials Science, University of Tuscia, Largo dell'Università, 01100 Viterbo, Italy; agresti@unitus.it

\* Correspondence: pelosi@unitus.it; Tel.: +39-0761-357673

## Method

X-ray diffraction (XRD) analysis was performed on samples APB1, APB2 and APB3 through a Siemens Kristalloflex Diffractometer equipped with a Cu anode ( $\lambda=1.5418 \text{ \AA}$ ) operating at 40 kV (accelerating voltage) and 30 mA (beam current).

## Results

XRD data are reported in the Tables S1-S3. FWHM conventionally is the Full Width Half Maximum of the diffraction peaks and gives a measure of the energy resolution.

**Table S1.** XRD data for sample APB1.

| 2-Theta       | d(Å)        | Height       | I/I <sub>0</sub> (%) | Area          | FWHM         |
|---------------|-------------|--------------|----------------------|---------------|--------------|
| 14.936        | 5.93        | 383          | 3                    | 2254          | 0.075        |
| 27.039        | 3.30        | 2962         | 24                   | 47208         | 0.141        |
| 28.677        | 3.11        | 240          | 2                    | 2222          | 0.082        |
| <b>29.980</b> | <b>2.98</b> | <b>12557</b> | 100                  | <b>207215</b> | <b>0.146</b> |
| 31.285        | 2.86        | 999          | 8                    | 14308         | 0.127        |
| 34.734        | 2.58        | 3991         | 32                   | 71588         | 0.159        |
| 44.755        | 2.02        | 1108         | 9                    | 19488         | 0.156        |
| 49.825        | 1.83        | 4162         | 33                   | 89768         | 0.191        |
| 52.989        | 1.73        | 959          | 8                    | 18021         | 0.167        |
| 55.528        | 1.65        | 268          | 2                    | 5358          | 0.177        |
| 59.155        | 1.56        | 3343         | 27                   | 84832         | 0.225        |
| 62.050        | 1.49        | 940          | 7                    | 22494         | 0.212        |
| 65.047        | 1.43        | 146          | 1                    | 1875          | 0.114        |

**Table S2.** XRD data for sample APB2.

| 2-Theta       | d(Å)        | Height       | I/I <sub>0</sub> (%) | Area          | FWHM         |
|---------------|-------------|--------------|----------------------|---------------|--------------|
| 14.968        | 5.91        | 372          | 3                    | 3611          | 0.086        |
| 27.053        | 3.29        | 3057         | 26                   | 41842         | 0.122        |
| 28.691        | 3.11        | 180          | 2                    | 2067          | 0.101        |
| <b>29.980</b> | <b>2.98</b> | <b>11941</b> | 100                  | <b>178437</b> | <b>0.133</b> |
| 31.299        | 2.86        | 1061         | 9                    | 14240         | 0.119        |
| 34.720        | 2.58        | 3844         | 32                   | 61053         | 0.140        |

|        |      |      |    |       |       |
|--------|------|------|----|-------|-------|
| 42.788 | 2.11 | 127  | 1  | 2551  | 0.178 |
| 44.742 | 2.02 | 1245 | 10 | 17010 | 0.121 |
| 45.555 | 1.99 | 132  | 1  | 1039  | 0.069 |
| 49.810 | 1.83 | 4379 | 37 | 82021 | 0.166 |
| 52.989 | 1.73 | 1088 | 9  | 17287 | 0.141 |
| 55.540 | 1.65 | 324  | 3  | 3428  | 0.094 |
| 59.140 | 1.56 | 3855 | 32 | 79652 | 0.183 |
| 62.006 | 1.50 | 965  | 8  | 21661 | 0.199 |
| 65.066 | 1.43 | 150  | 1  | 2267  | 0.134 |

Table S3. XRD data for sample APB3.

| 2-Theta       | d(Å)        | Height       | I/I <sub>0</sub> (%) | Area          | FWHM         |
|---------------|-------------|--------------|----------------------|---------------|--------------|
| 14.994        | 5.90        | 286          | 3                    | 3369          | 0.104        |
| 27.040        | 3.29        | 2863         | 25                   | 37122         | 0.115        |
| 28.677        | 3.11        | 164          | 1                    | 1694          | 0.092        |
| <b>29.994</b> | <b>2.98</b> | <b>11362</b> | 100                  | <b>153625</b> | <b>0.119</b> |
| 31.299        | 2.86        | 1014         | 9                    | 14865         | 0.130        |
| 34.721        | 2.58        | 4146         | 36                   | 57362         | 0.122        |
| 42.834        | 2.11        | 122          | 1                    | 1804          | 0.131        |
| 44.755        | 2.02        | 1310         | 12                   | 15154         | 0.103        |
| 49.810        | 1.83        | 4793         | 42                   | 74764         | 0.138        |
| 52.975        | 1.73        | 1270         | 11                   | 16690         | 0.117        |
| 55.565        | 1.65        | 337          | 3                    | 3931          | 0.103        |
| 59.125        | 1.56        | 4434         | 39                   | 76255         | 0.152        |
| 62.034        | 1.49        | 1104         | 10                   | 21818         | 0.175        |
| 65.036        | 1.43        | 240          | 2                    | 2159          | 0.080        |

## Discussion

The XRD patterns of samples APB1, APB2 and APB3 exhibit the main d(Å) values at 3.29, 2.98 (100%), 2.58, 1.83, and 1.56.

The research in XRD databases did not find any correspondence with known antimonates, such as Pb<sub>2</sub>Sb<sub>2</sub>O<sub>7</sub> (JCPDS file 18-687), Pb<sub>2.5</sub>Sb<sub>1.5</sub>O<sub>6.75</sub> (JCPDS file 43-0883), Pb<sub>3+x</sub>Sb<sub>2</sub>O<sub>8+x</sub> (JCPDS file 34-1196), and PbSb<sub>2</sub>O<sub>6</sub> (JCPDS file 34-0912), this last being the compound named rosielite often found in combination with Pb<sub>2</sub>Sb<sub>2</sub>O<sub>7</sub> also in artworks [18].

All these compounds were found in yellow samples prepared without the addition of NaCl or C<sub>4</sub>H<sub>5</sub>KO<sub>6</sub>.

As a consequence of this result, we may suppose that the addition of sodium chloride caused the production of Pb/Sb compounds incorporating also Na and Cl whose composition is not known or no XRD pattern is present in the JCPDS database.
